# Supplementary material
Source: Research Square preprint supplement (doi:10.21203/rs.3.rs-10007236/v1)
Supplement: Supplementary file 1 [file 44965b4055173f782c3a5696.docx]

# Additional File 1: Teaching-Scholarship Community Identity Questionnaire

Instrument Description

This questionnaire measures faculty members' identification with their interdisciplinary teaching-scholarship community—their sense of belonging, value commitment, and willingness to sustain participation. The five-dimension structure was derived a priori from community-of-practice theory and is consistent with the organizational-identification framing of the study. It comprises 15 items across five dimensions, rated on a 6-point scale (0 = Strongly Disagree, 1 = Disagree, 2 = Somewhat Disagree, 3 = Somewhat Agree, 4 = Agree, 5 = Strongly Agree).

Demographic Information

Role: Team leader / Team memberGender: Male / FemaleAge: 26–35 / 36–45 / 46–55 / Over 55Duration of participation in the teaching-scholarship community: Less than 1 year / 1–2 years / 2–5 years / Over 5 years

Part I: Shared Purpose

**1.** Our team has a clear common goal and shared vision.

**2.** I clearly understand the connection between the team's goals and my own professional development.

**3.** The team's goals effectively promote teaching innovation or curriculum development.

Part II: Collaboration and Member Relationships

**1.** Team members have established a relatively stable mechanism for collaboration.

**2.** Internal communication channels within the team are smooth and efficient.

**3.** Team members proactively share resources and support each other; there is an atmosphere that encourages collaboration.

Part III: Learning and Knowledge Sharing

**1.** The team periodically organizes interdisciplinary teaching seminars or training activities.

**2.** The team has established a shared knowledge repository or resource-sharing platform.

**3.** Team members are willing to share their teaching practice experiences—both successes and failures—and academic discoveries within the team.

Part IV: Respect for Diversity

**1.** The team accommodates differences in thinking across disciplinary backgrounds.

**2.** The team encourages members to propose non-traditional teaching ideas or methods.

**3.** The team fully considers multiple perspectives during discussions and effectively resolves disciplinary culture conflicts.

Part V: Sustainability

**1.** The team has set phased goals and periodically reviews progress, making dynamic adjustments as needed.

**2.** I have a strong willingness to continue participating in the team.

**3.** I believe the team can flexibly respond to changes in the external environment.

Open-Ended Question

What aspect of the current community building do you think most needs improvement?
