# Supplementary material
Source: Research Square preprint supplement (doi:10.21203/rs.3.rs-10007236/v1)
Supplement: Supplementary file 2 [file 9a771c16c7960ba51b59565d.docx]

# Additional File 2: Semi-Structured Interview Guide

Instrument Description

This interview guide explores how faculty come to identify with their interdisciplinary teaching-scholarship community—the pathways through which identification is constructed and the organizational conditions that promote or constrain it. It was used with both community conveners and ordinary members; convener-specific items (Sections II–IV) probe leadership, collaboration, and resourcing, while the framing, opening, and closing questions apply to all participants and were adapted to a member's vantage point where appropriate. Questions were informed by community-of-practice and organizational-identification perspectives. Each interview lasted 45–60 minutes, was audio-recorded, and transcribed verbatim.

Section I: Background Information

**1.** Please briefly introduce your teaching-scholarship community, including its main objectives and tasks.

**2.** What is the most pressing issue your community currently faces? How do you address it?

Section II: Team Leadership Perspective

**1.** As the community leader, what do you see as your primary role? How do you allocate responsibilities and tasks among team members?

**2.** How do you promote collaboration and communication among team members? How do you ensure that members from different disciplinary backgrounds can work together effectively?

**3.** Is conflict common in your interdisciplinary community? How do you manage internal disagreements?

**4.** In the process of improving teaching quality, how do you balance task orientation (e.g., completing course requirements) with innovation (e.g., pedagogical reform)?

**5.** How do you motivate team members to participate in teaching innovation? How do you handle different reactions to change?

**6.** What do you consider the most significant difference between what your community does and what a conventional teaching team does?

Section III: Resource Dependence Perspective

**1.** How do you ensure access to the resources needed for community development—including but not limited to research funding, technical support, and personnel?

**2.** How does your community interact with the university, peers, and the broader academic community to obtain resources? How does this interaction support community development?

**3.** How do you allocate and utilize existing resources within the community? Are there challenges in resource allocation, and how do you address them?

**4.** How do you ensure a stable, long-term supply of resources for the community? Do you have strategies to enhance resource sustainability?

Section IV: Community Building and Promotion

**1.** How would you assess the current effectiveness of your community's development? In which areas has significant progress been made?

**2.** What measures do you think the university could take to further promote the development of teaching-scholarship communities? Are there successful experiences you can share?

**3.** Looking ahead, what key factors do you believe will influence the community's growth and innovation?

Section V: Summary and Recommendations

**1.** As a community leader, what advice would you offer to leaders of other teaching-scholarship communities?

**2.** What aspect of community building do you think most urgently needs improvement?

**3.** Do you have any other thoughts or experiences to share that could help advance the development of teaching-scholarship communities?
