# Supplementary material
Source: Research Square preprint supplement (doi:10.21203/rs.3.rs-10007236/v1)
Supplement: Supplementary file 3 [file dbc08f7e8495f2a42b55e63a.docx]

# Additional File 3: COREQ 32-Item Checklist

**Consolidated Criteria for Reporting Qualitative Research (COREQ): 32-Item Checklist**

This checklist documents how the qualitative strand of the present mixed-methods study (semi-structured interviews, N = 20) addresses the 32 COREQ items (Tong, Sainsbury & Craig, 2007). Where an item was not applicable, this is stated honestly rather than overclaimed. Page/section references point to the main manuscript.

## Domain 1: Research Team and Reflexivity

### Personal Characteristics

**1. Interviewer/facilitator** — Which author conducted the interviews? The first author, a staff member of the university's center for faculty development, conducted all interviews. (Methods §3.2, §3.5)

**2. Credentials** — What were the researcher's credentials? The first author holds a graduate degree and works in faculty development and educational research at the institution.

**3. Occupation** — What was their occupation at the time of the study? Staff member of the center for faculty development. (Methods §3.2)

**4. Gender** — Was the researcher male or female? Female.

**5. Experience and training** — What experience or training did the researcher have? The researcher has prior experience in educational research and qualitative interviewing; thematic analysis followed the established Braun & Clarke reflexive procedure. (Methods §3.5)

### Relationship with Participants

**6. Relationship established** — Was a relationship established prior to study commencement? Yes. Through her role in the center for faculty development, the researcher had a prior professional relationship with participants. This positionality is explicitly disclosed and managed. (Methods §3.5; Declarations: Competing interests)

**7. Participant knowledge of the interviewer** — What did participants know about the researcher? Participants knew the researcher's role in faculty development. Before each interview, she explicitly stated that the study was independent of project appraisal and that responses would not affect any project rating. (Methods §3.5)

**8. Interviewer characteristics** — What characteristics were reported about the interviewer? The professional positionality and its potential for social-desirability bias are reported, together with the measures taken to offset it. (Methods §3.5)

## Domain 2: Study Design

### Theoretical Framework

**9. Methodological orientation and theory** — What methodological orientation underpinned the study? Reflexive thematic analysis (Braun & Clarke), inductive orientation, within an explanatory sequential mixed-methods design. Self-Determination Theory was used only as an interpretive lens in the discussion, not as an a priori coding frame. (Methods §3.1, §3.5; Theory §2.3)

### Participant Selection

**10. Sampling** — How were participants selected? Stratified purposive sampling across role (leader/member), participation duration, and disciplinary background. (Methods §3.3)

**11. Method of approach** — How were participants approached? Through institutional communication channels; participation was voluntary. (Methods §3.3, §3.4)

**12. Sample size** — How many participants were in the study? 20 interviewees (11 community leaders coded F1–F11; 9 members coded T1–T9). (Methods §3.3)

**13. Non-participation** — How many people refused or dropped out, and why? Participation was voluntary; no formal refusal/drop-out log was maintained. *(Not separately recorded.)*

### Setting

**14. Setting of data collection** — Where was the data collected? At the participating university (its specific name is withheld for blind review), in private settings convenient to participants. (Methods §3.2, §3.4)

**15. Presence of non-participants** — Was anyone else present? No; interviews were conducted one-to-one.

**16. Description of sample** — What are the important characteristics of the sample? Role, gender, age, participation duration, and disciplinary background are described. (Methods §3.3; Table 1)

### Data Collection

**17. Interview guide** — Were questions/prompts provided? Yes. The semi-structured interview guide is provided as Additional File 2. (Methods §3.4)

**18. Repeat interviews** — Were repeat interviews carried out? No; each participant was interviewed once.

**19. Audio/visual recording** — Did the research use recording? Yes; interviews were audio-recorded with verbal consent. (Methods §3.4; Ethics §3.7)

**20. Field notes** — Were field notes made? Yes; the researcher kept analytic notes as part of the audit trail. (Methods §3.5)

**21. Duration** — How long were the interviews? 45–60 minutes each. (Methods §3.4; Additional File 2)

**22. Data saturation** — Was saturation discussed? Yes; interviews continued until no new themes emerged and informational saturation was judged to have been reached. (Methods §3.3, §3.5)

**23. Transcripts returned** — Were transcripts returned to participants? No; transcripts were not returned for comment. *(Not performed.)*

## Domain 3: Analysis and Findings

### Data Analysis

**24. Number of data coders** — How many coders coded the data? Two researchers coded independently and cross-checked; disagreements were resolved through discussion. (Methods §3.5)

**25. Description of the coding tree** — Did authors provide a description of the coding tree? Yes; the three-round coding procedure (open coding → clustering into candidate themes → refining into "construction pathways" vs. "organizational conditions") is described. (Methods §3.5; Results §4.2)

**26. Derivation of themes** — Were themes identified in advance or derived from the data? Themes were derived inductively from the data. (Methods §3.5)

**27. Software** — What software was used to manage the data? NVivo. (Methods §3.5)

**28. Participant checking** — Did participants provide feedback on the findings? No formal member-checking of findings was conducted. *(Not performed.)*

### Reporting

**29. Quotations presented** — Were participant quotations used to illustrate the themes? Yes; quotations are presented throughout the Results and identified by participant code (e.g., F1, T1). (Results §4.2–§4.3)

**30. Data and findings consistent** — Was there consistency between the data presented and the findings? Yes; each pathway and organizational condition is supported by coded quotations, and quantitative–qualitative convergence is shown in the joint display. (Results §4.2–§4.4)

**31. Clarity of major themes** — Were major themes clearly presented? Yes; the three identity-construction pathways and the organizational conditions are presented as distinct, clearly labeled themes. (Results §4.2)

**32. Clarity of minor themes** — Is there a description of diverse cases or minor themes? Yes; dysfunctional-team counter-cases and negative narratives (e.g., power asymmetry, resource competition) are explicitly reported, demonstrating that social-desirability bias did not suppress negative information. (Results §4.3; Methods §3.5)

*Reference: Tong A, Sainsbury P, Craig J. Consolidated criteria for reporting qualitative research (COREQ): a 32-item checklist for interviews and focus groups. Int J Qual Health Care. 2007;19(6):349–357.*
